# Supplementary material
Source: Springer Nature journal article supplement (https://www.springermedizin.de/resource/supplementary/13584_2012_29_MOESM1_ESM.pdf/9676828)

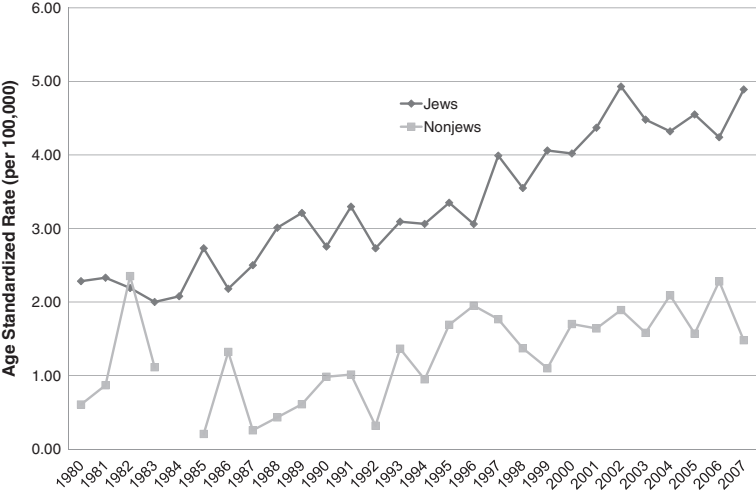

Supplement: MOESM1 [file 9676828]
